# Supplementary material
Source: PubMed Central journal article supplement (PMC10529708)
Supplement: NIHMS1923041-supplement-Supplemental_Publication_Material.pdf [file NIHMS1923041-supplement-Supplemental_Publication_Material.pdf]

## **SUPPLEMENTAL MATERIAL**

### **Development and Validation of a Novel Bleeding Risk Prediction Tool for Patients with Atrial Fibrillation**

#### **Author Names and Affiliations:**

Rahul Aggarwal<sup>1,2</sup>, MD, Christian T. Ruff<sup>3</sup>, MD, MPH, Saverio Virdone<sup>4</sup>, MSc, Sylvie Perreault, BPharm<sup>5</sup>, PHD, Ajay K. Kakkar<sup>4,6</sup>, MBBS, PhD, Michael G. Palazzolo<sup>3</sup>, MPH, Marc Dorais<sup>7</sup>, MSc, Gloria Kayani<sup>4</sup>, BSc, Daniel E. Singer<sup>8</sup>, MD, Eric Secemsky<sup>1</sup>, MD, Jonathan Piccini<sup>9</sup>, MD, MHS, Usman A. Tahir<sup>1</sup>, MD, MBI, Changyu Shen<sup>10</sup>, PhD, Robert W. Yeh<sup>1</sup>, MD, MSc

<sup>1</sup>Richard A. and Susan F. Smith Center for Outcomes Research in Cardiology, Division of Cardiology, Beth Israel Deaconess Medical Center, Harvard Medical School, Boston, Massachusetts

<sup>2</sup>Heart and Vascular Center, Brigham and Women's Hospital, Harvard Medical School, Boston, Massachusetts

<sup>3</sup>TIMI Study Group, Division of Cardiovascular Medicine, Brigham and Women's Hospital, Harvard Medical School, Boston, Massachusetts, United States

<sup>4</sup>Thrombosis Research Institute, London, United Kingdom

<sup>5</sup>Faculty of Pharmacy, University of Montreal, Montreal, Quebec, Canada

<sup>6</sup>University College London, London, United Kingdom

<sup>7</sup>StatSciences Inc., Notre-Dame-de-l'Île-Perrot, Quebec, Canada

<sup>8</sup>Division of General Internal Medicine, Massachusetts General Hospital, Harvard Medical School, Boston, Massachusetts

<sup>9</sup>Duke Clinical Research Institute, Duke University, Durham, North Carolina

<sup>10</sup>Advanced Analytics, Biogen Digital Health and Worldwide Medical, Cambridge, Massachusetts

## **Supplemental Figures**

**Supplemental Figure 1. Calibration Plot for Major Bleeding**

**Supplemental Figure 2. Calibration Plot, Life-Threatening Bleeding**

**Supplemental Figure 3. Kaplan-Meier Curves for Life-Threatening or Fatal Bleeding Outcomes by Predicted Risk Category**

**Supplemental Figure 4. The DOAC Score by HAS-BLED Score**

**Supplemental Figure 5. The DOAC Score by CHA<sub>2</sub>DS<sub>2</sub>-VASc Scores**

## **Supplemental Tables**

**Supplemental Table 1. Candidate Variables**

**Supplemental Table 2. The DOAC Score Prior to Model Refinement**

**Supplemental Table 3. Final Multivariable Model**

**Supplemental Table 4. Bleeding Event Rates in the RE-LY Trial by Risk Score**

**Supplemental Table 5. Life-Threatening Bleeding Event Rates in the RE-LY Trial by Risk Group**

**Supplemental Table 6. Cohort Variables and Adaptations: GARFIELD-AF**

**Supplemental Table 7. Cohort Variables and Adaptations: COMBINE-AF**

**Supplemental Table 8. Cohort Variables and Adaptations: RAMQ**

**Supplemental Table 9. Baseline Characteristics by Major Bleeding Occurrence in GARFIELD-AF**

**Supplemental Table 10. Baseline Characteristics by Major Bleeding Occurrence in COMBINE-AF**

**Supplemental Table 11. Baseline Characteristics by Major Bleeding Occurrence in RAMQ**

**Supplemental Table 12. One-Year Bleeding Rates by Risk Category for Individuals in COBMINE-AF**

**Supplemental Table 13. The DOAC Score Performance by Trial in COBMINE-AF**

**Supplemental Table 14. TRIPOD Checklist: Prediction Model Development and Validation**

## **Supplemental Methods**

**Definitions of Major Bleeding**

### Supplemental Figure 1. Calibration Plot for Major Bleeding

Presented is the calibration of the continuous model (Figure 1A) and the clinical risk prediction score (Figure 1B) in the RE-LY trial at 1-year. X-axis demonstrates the predicted 1-year event rate without a major bleeding event. The Y-axis demonstrates the actual 1-year major bleeding event rate. The black lines represents perfect calibration, whereas the blue line demonstrates the observed optimism corrected calibration. Optimism correction was done by bootstrapping 200 resamples. Individuals were included if they were in the dabigatran 150 mg arm twice daily of the trial. Individuals with missing information for the candidate variables of interest were excluded.

**Figure 1A. Calibration Plot for the Continuous Model**

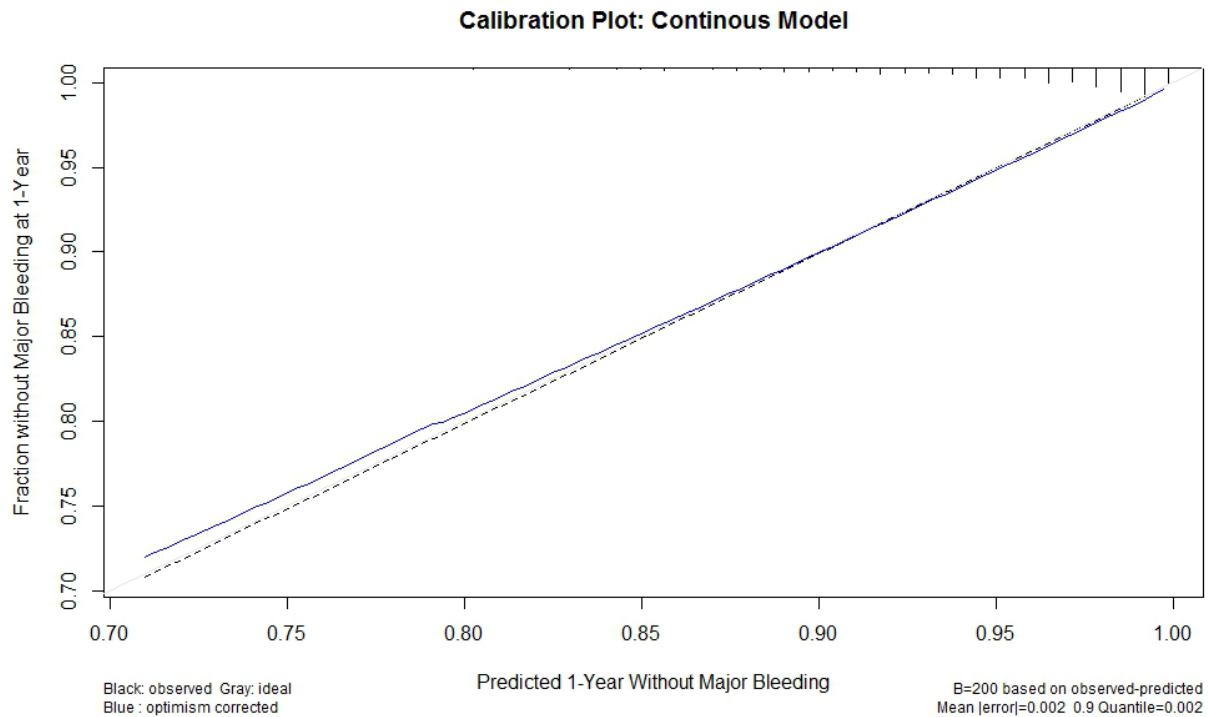

Figure 1B. Calibration Plot for the DOAC Score

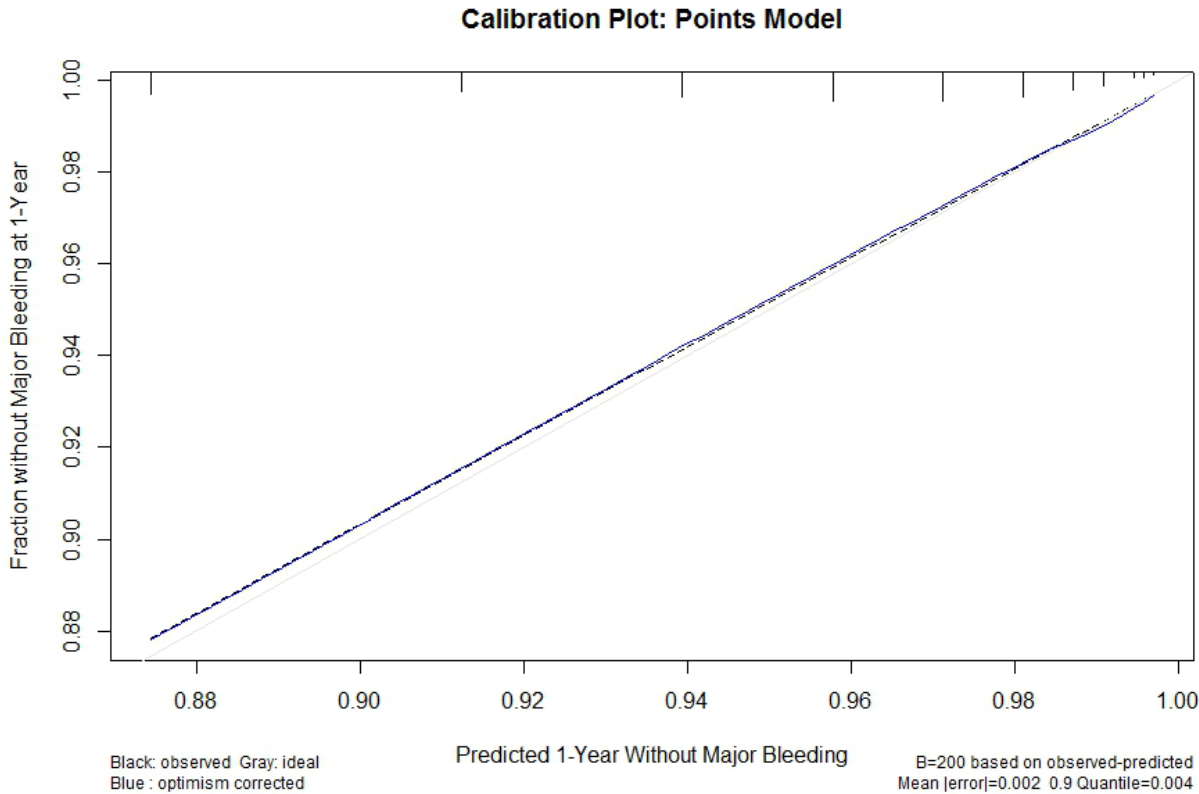

## Supplemental Figure 2. Calibration Plot, Life-Threatening Bleeding

Presented is the calibration of the DOAC Score in the RE-LY trial at 1-year. X-axis demonstrates the predicted 1-year event rate without a life-threatening bleeding event. The Y-axis demonstrates the actual 1-year life-threatening bleeding event rate. The black lines represents perfect calibration, whereas the blue line demonstrates the observed optimism corrected calibration. Optimism correction was done by bootstrapping 200 resamples. Individuals were included if they were in the dabigatran 150 mg twice daily arm of the trial. Individuals with missing information for the candidate variables of interest were excluded.

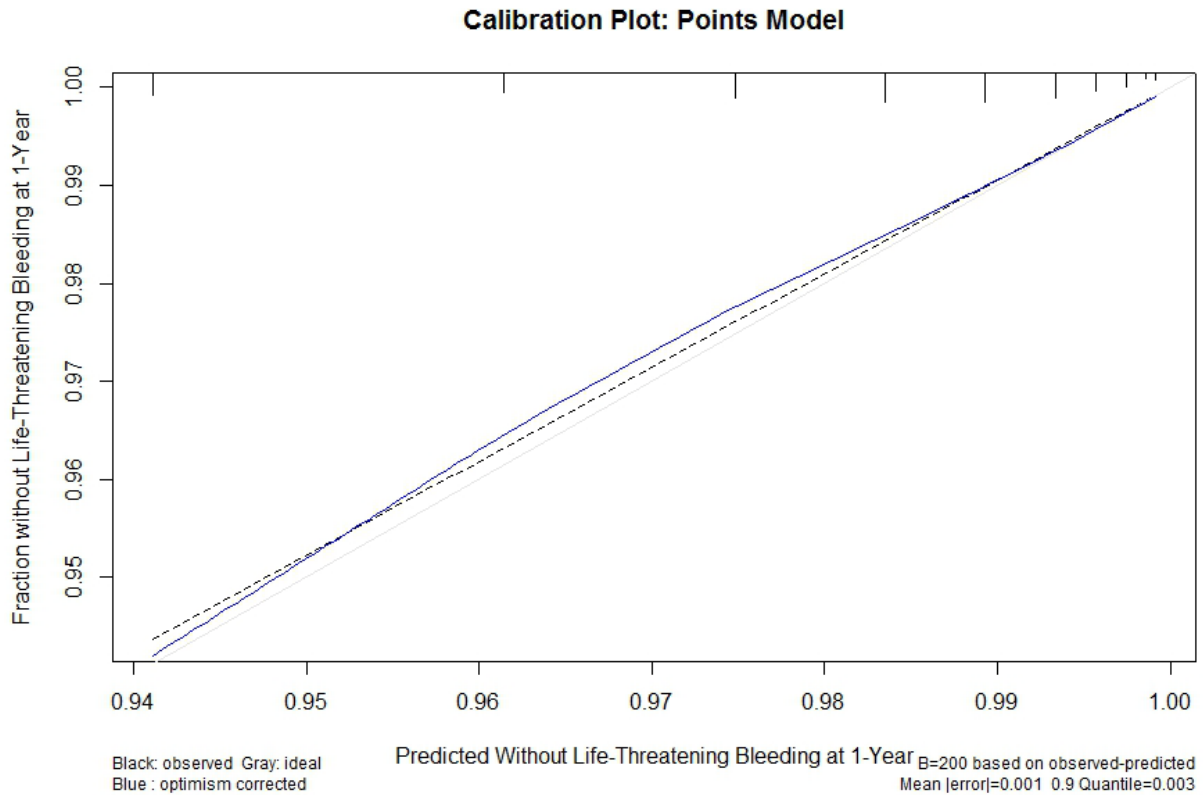

### Supplemental Figure 3. Kaplan-Meier Curves for Life-Threatening or Fatal Bleeding Outcomes by Predicted Risk Category

Presented are the Kaplan-Meier curves for individuals in the RE-LY (1A) and COMBINE-AF (1B). The outcome in RE-LY was life-threatening bleeding. The outcome for COMBINE-AF was fatal bleeding. Definitions are described in the Supplemental Methods section. Kaplan-Meier curves were based on the risk category assigned to individuals by the DOAC Score. Risk-scores were 1-10, with risk categories assigned as: very low (score 0-3), low (score 4-5), moderate (score 6-7), high (score 8-9) and very high (score 10). Individuals in RE-LY were included if they were in the dabigatran 150 mg twice daily arm of the trial. Individuals in COMBINE-AF were included if they were on any direct-acting oral anticoagulant (DOAC).

#### A) Kaplan-Meier Curves for Life-Threatening Bleeding by Risk Category in RE-LY

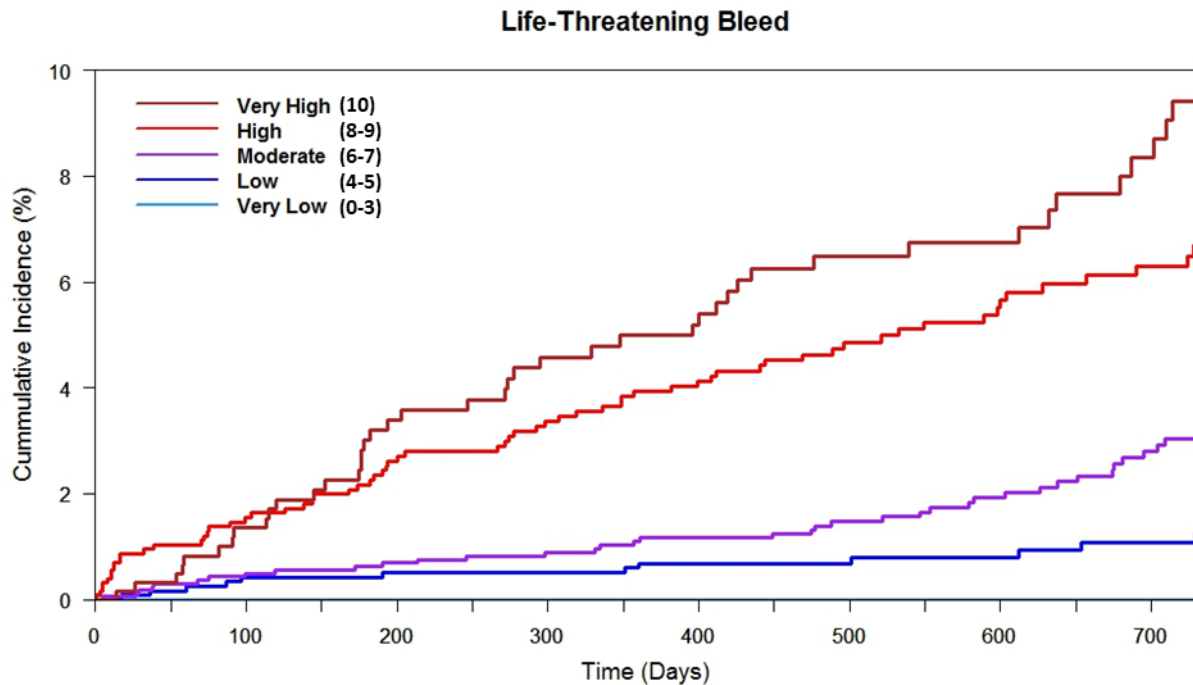

#### B) Kaplan-Meier Curves for Fatal Bleeding by Risk Category in COMBINE-AF

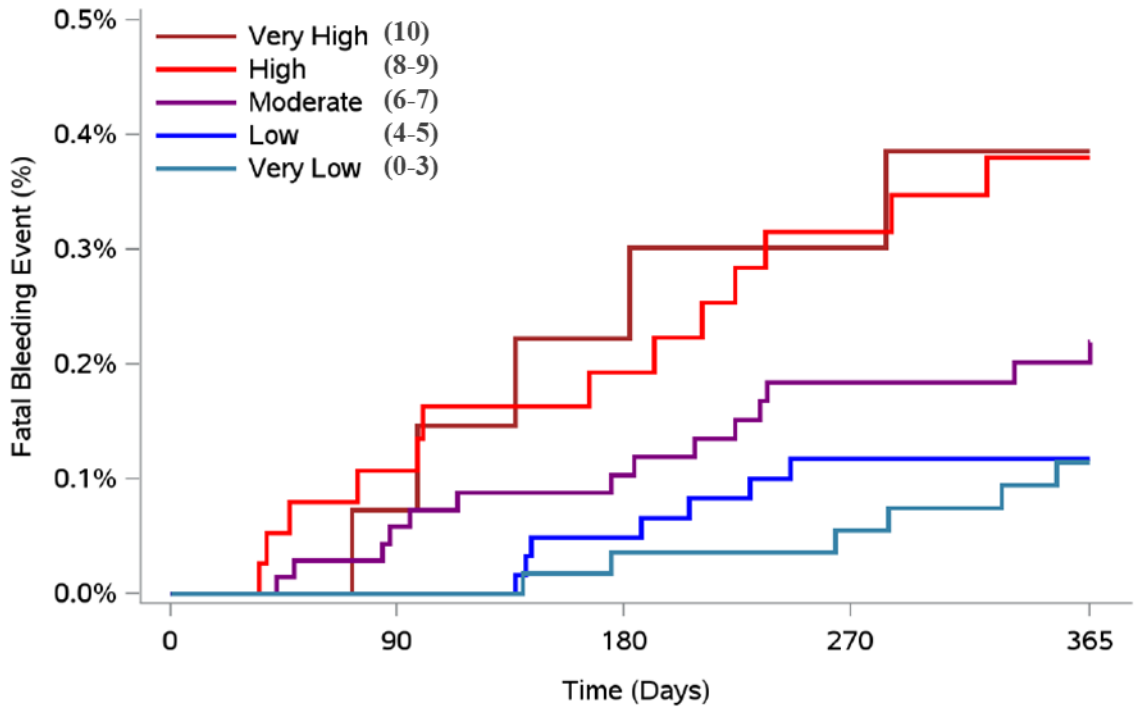

### Supplemental Figure 4. The DOAC Score by HAS-BLED Score

Presented are the risk scores assigned by the DOAC Score for individuals in the development cohort (RE-LY) by HAS-BLED score. The X-axis demonstrates the DOAC Score, while the Y axis displays the proportion of individuals with that score. Shading indicates HAS-BLED score. Individuals were included if they were in the dabigatran 150 mg twice daily arm of the trial. Individuals were excluded if they had missing information for the predictor variables of interest or missing data for calculation of the HAS-BLED score. Individuals were followed through their entire enrollment in the trial.

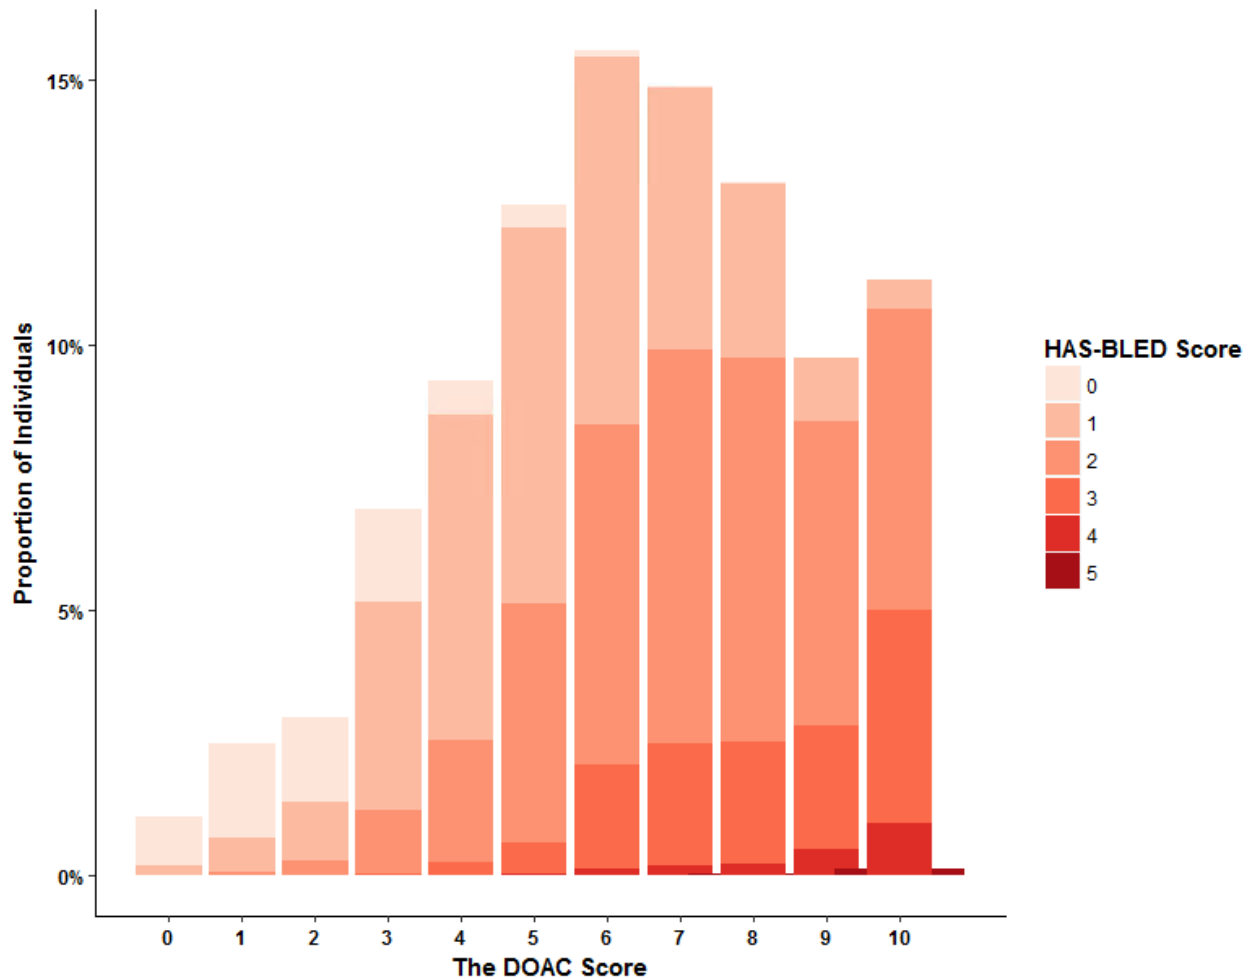



### Supplemental Figure 5. The DOAC Score by CHA<sub>2</sub>DS<sub>2</sub>-VASc Scores

Presented are the risk scores assigned by the DOAC Score for individuals in the development cohort (RE-LY) by CHA<sub>2</sub>DS<sub>2</sub>-VASc score (Figure 2B). The X-axis demonstrates the DOAC Score, while the Y axis displays the proportion of individuals with that score. Shading indicates CHA<sub>2</sub>DS<sub>2</sub>-VASc score. Individuals were included if they were in the dabigatran 150 mg twice daily arm of the trial. Individuals were excluded if they had missing information for the predictor variables of interest or missing data for calculation of the CHA<sub>2</sub>DS<sub>2</sub>-VASc score. Individuals were followed through their entire enrollment in the trial.

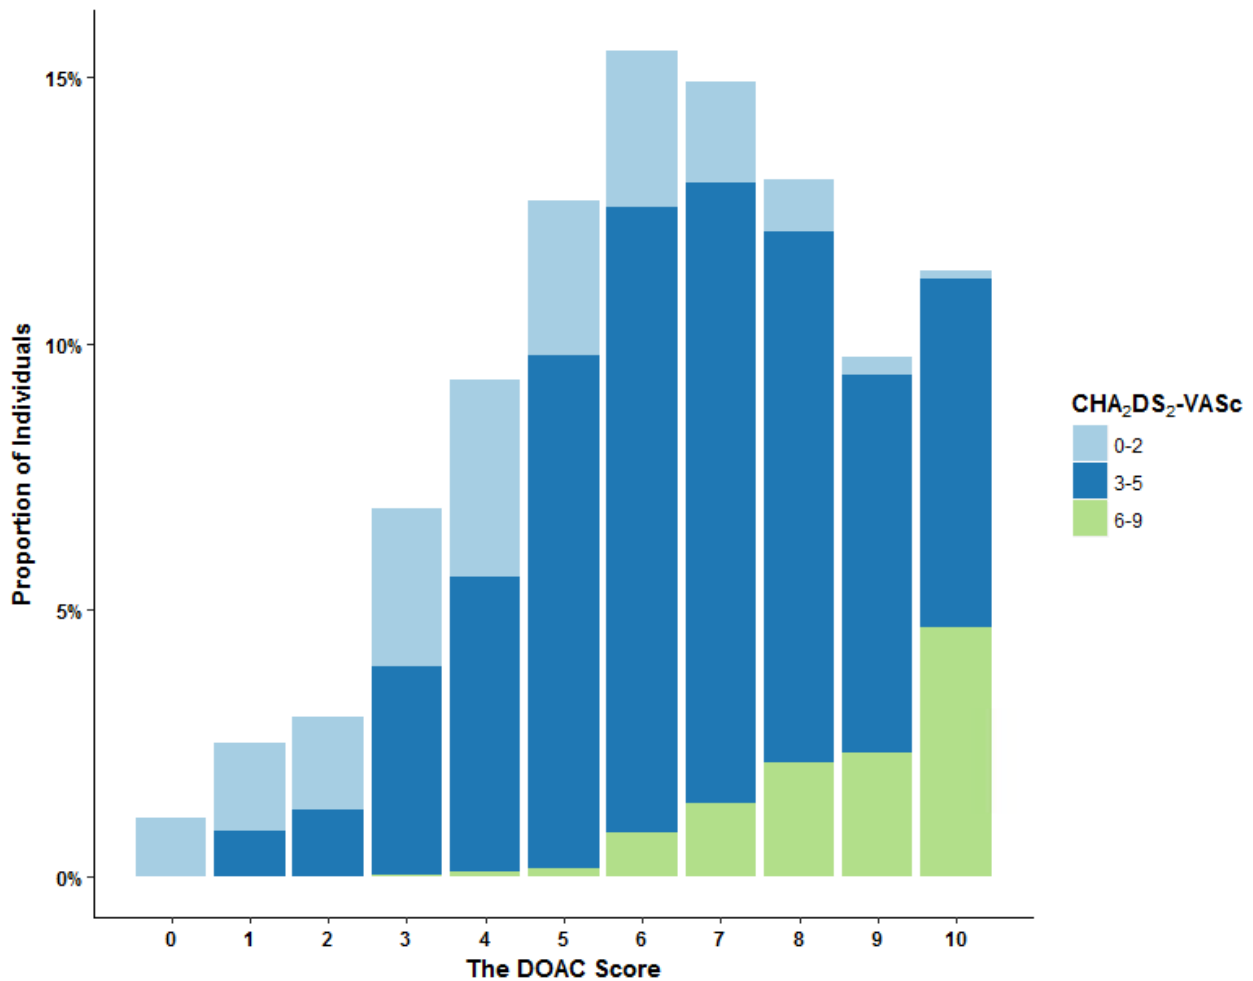

## Supplemental Table 1. Candidate Variables

Presented are the candidate variables that were considered during model development in the RE-LY trial. Candidate variables were selected based on prior evidence for association with bleeding risk or clinical rationale for ability to predict bleeding events. Smoking history was defined as an individual with smoking history of  $\geq 100$  cigarettes over a lifetime. Alcohol use disorder was defined as  $\geq 5$  alcohol drinks per week. Body mass index was initially categorized as  $\geq 30$  kg/m<sup>2</sup> vs  $< 30$  kg/m<sup>2</sup>, but was reclassified during recalibration as  $< 18.5$  kg/m<sup>2</sup> vs  $\geq 18.5$  kg/m<sup>2</sup>). Smoking history was excluded on recalibration (see methods section). Creatinine clearance was determined based on the Cockcroft-Gault equation. Due to low inclusion of individuals with bleeding history or liver disease in RE-LY, points for these variables were assigned based on clinical rationale. Clinical rationale incorporated expert perceived risk of clinically significant bleeding history and liver disease for the outcomes of interest. eGFR = estimated glomerular filtration rate.

| <b>Candidate Variables</b>                                                                                                        |                   |
|-----------------------------------------------------------------------------------------------------------------------------------|-------------------|
| <b>Age (Years)</b>                                                                                                                |                   |
|                                                                                                                                   | 65-69             |
|                                                                                                                                   | 70-74             |
|                                                                                                                                   | 75-79             |
|                                                                                                                                   | 80-84             |
|                                                                                                                                   | $\geq 85$         |
| <b>Sex (Male/Female)</b>                                                                                                          |                   |
| <b>Body Mass Index (<math>&lt; 18.5</math> kg/m<sup>2</sup> vs <math>\geq 18.5</math> kg/m<sup>2</sup>)</b>                       |                   |
| <b>Creatinine Clearance/eGFR (mL/min)</b>                                                                                         |                   |
|                                                                                                                                   | 30-60             |
|                                                                                                                                   | $< 30$            |
| <b>Smoking History (Prior or Current)</b>                                                                                         |                   |
| <b>Alcohol Use Disorder (Alcohol Use <math>\geq 5</math> days per week)</b>                                                       |                   |
| <b>Stroke, Transient Ischemic Attack, Systemic Embolism History</b>                                                               |                   |
| <b>Diabetes (History)</b>                                                                                                         |                   |
| <b>Hypertension (History)</b>                                                                                                     |                   |
| <b>Coronary Artery Disease (History)</b>                                                                                          |                   |
| <b>Antiplatelet Use (Current)</b>                                                                                                 |                   |
|                                                                                                                                   | Aspirin           |
|                                                                                                                                   | Dual Antiplatelet |
| <b>Nonsteroidal Anti-Inflammatory Use (Current)</b>                                                                               |                   |
| <b>Heart Failure (History)</b>                                                                                                    |                   |
| <b>Bleeding History (History of Major or Minor Bleeding Event)</b>                                                                |                   |
| <b>Liver Disease (AST, ALT, ALP <math>\geq 3X</math> Upper limit of normal or ALP <math>\geq 2X</math> Upper limit of normal)</b> |                   |

## Supplemental Table 2. The DOAC Score Prior to Model Refinement

Presented is the original risk score developed prior to the model refinement step outlined in the methods section. In model refinement, weight was converted to underweight/normal weight based and smoking history was removed due to low predictive ability. The prediction model was then refit, allowing for new coefficients (Supplemental Table 3). The prediction score was developed in the RE-LY trial participants, including individuals on direct-acting oral anticoagulants (DOACs). The maximum number of allocated points for an individual is 10 points to prevent overestimation in the high-risk groups.

### 2A) The DOAC Score Prior to Model Updating

| Clinical Risk Prediction Tool                     | Points |
|---------------------------------------------------|--------|
| <b>Age, years</b>                                 |        |
| 65-69                                             | 2      |
| 70-74                                             | 3      |
| $\geq 75$                                         | 4      |
| <b>Creatinine Clearance/eGFR (mL/min)</b>         |        |
| 30-60                                             | 1      |
| <30                                               | 2      |
| <b>Obesity (BMI <math>\geq 30</math>)</b>         | 1      |
| <b>Smoking History</b>                            | 1      |
| <b>Stroke/TIA/Embolic History</b>                 | 1      |
| <b>Diabetes</b>                                   | 1      |
| <b>Hypertension</b>                               | 1      |
| <b>Antiplatelet Use</b>                           |        |
| Aspirin                                           | 2      |
| Dual-Antiplatelet                                 | 3      |
| <b>Nonsteroidal Anti-inflammatory (NSAID) Use</b> | 1      |

|                                                        |          |
|--------------------------------------------------------|----------|
| <b>Bleeding History</b>                                | <b>3</b> |
| <b>Liver Disease</b>                                   | <b>2</b> |
| <i>Total Score Range: 0-10<br/>(Maximum 10 points)</i> |          |

**2B) The DOAC Score Performance Prior to Model Refinement**

|                                          | C Statistic              |                  | P for Difference |
|------------------------------------------|--------------------------|------------------|------------------|
|                                          | DOAC Score               | HAS-BLED Score   |                  |
| <b>Major Bleeding - RE-LY</b>            | 0.73 (0.71-0.75)         | 0.60 (0.58-0.62) | <0.001           |
| <b>Life Threatening Bleeding - RE-LY</b> | 0.75 (0.72-0.78)         | 0.61 (1.29-1.97) | <0.001           |
| <b>Major Bleeding GARFIELD-AF</b>        | 0.69 (95% CI: 0.65-0.73) | 0.66 (0.62-0.71) | 0.133            |

### Supplemental Table 3. Final Multivariable Model

Presented are the final variables in the multivariable Cox regression model. The model was developed in the RE-LY trial, among individuals in the dabigatran 150mg twice daily arm of the trial and who had no missing follow-up information. Variables were selected based on a stepwise selection approach. Due to low sample size of individuals with bleeding history and liver disease in the development cohort, these variables were required to be included. Points were assigned to the final clinical risk prediction score by the final coefficients (hazard ratios) for all variables except bleeding history and liver disease. These variables were manually assigned based on clinical rationale due to high likelihood of low event count bias. No variable was allowed more than half of the maximum number of points (5 points). Reference value for point assignment was 1.35 (the value that each hazard ratio was divided by).

| Individual Characteristic                                              |                   | Hazard Ratio | P-Value |
|------------------------------------------------------------------------|-------------------|--------------|---------|
| <b>Age (Years) (&lt; 65 reference)</b>                                 |                   |              |         |
|                                                                        | 65-69             | 2.45         | 0.001   |
|                                                                        | 70-74             | 3.48         | <0.001  |
|                                                                        | 75-79             | 4.85         | <0.001  |
|                                                                        | 80-84             | 6.85         | <0.001  |
|                                                                        | ≥85               | 9.82         | <0.001  |
| <b>Underweight (BMI &lt;18.5 kg/m<sup>2</sup>)</b>                     |                   | 2.00         | 0.069   |
| <b>Creatinine Clearance (mL/min) (&gt;60 reference)</b>                |                   |              |         |
|                                                                        | 30-60             | 1.18         | 0.159   |
|                                                                        | <30               | 2.92         | 0.010   |
| <b>Stroke, Transient Ischemic Attack, or Systemic Embolism History</b> |                   | 1.27         | 0.041   |
| <b>Diabetes</b>                                                        |                   | 1.53         | <0.001  |
| <b>Antiplatelet Use</b>                                                |                   |              |         |
|                                                                        | Aspirin           | 2.67         | <0.001  |
|                                                                        | Dual Antiplatelet | 3.77         | <0.001  |
| <b>Nonsteroidal Anti-Inflammatory Use</b>                              |                   | 1.36         | 0.022   |
| <b>Bleeding History</b>                                                |                   | 1.08         | 0.70    |
| <b>Liver Disease</b>                                                   |                   | 0.49         | 0.32    |
| <b>Hypertension</b>                                                    |                   | 1.35         | 0.033   |

#### Supplemental Table 4. Bleeding Event Rates in the RE-LY Trial by Risk Score

Presented are the observed 1-year and 2-year rates of bleeding in the RE-LY trial by the DOAC Score assigned risk scores. Individuals were included if they were in the dabigatran 150 mg twice daily arm of the trial. Individuals with missing information for the candidate variables of interest were excluded. Estimates are based on Cox regression models with clinical risk prediction score as the independent variable.

| <b>Risk Score by DOAC Score</b> | <b>Major Bleeding (1-Year)</b> | <b>Life-Threatening Bleeding (1-Year)</b> | <b>Major Bleeding (2-Year)</b> | <b>Life-Threatening Bleeding (2-Year)</b> |
|---------------------------------|--------------------------------|-------------------------------------------|--------------------------------|-------------------------------------------|
| <b>0</b>                        | 0.3%                           | 0.1%                                      | 0.6%                           | 0.2%                                      |
| <b>1</b>                        | 0.4%                           | 0.1%                                      | 0.8%                           | 0.3%                                      |
| <b>2</b>                        | 0.6%                           | 0.2%                                      | 1.2%                           | 0.4%                                      |
| <b>3</b>                        | 0.8%                           | 0.3%                                      | 1.7%                           | 0.6%                                      |
| <b>4</b>                        | 1.2%                           | 0.4%                                      | 2.4%                           | 1.0%                                      |
| <b>5</b>                        | 1.8%                           | 0.7%                                      | 3.4%                           | 1.4%                                      |
| <b>6</b>                        | 2.7%                           | 1.0%                                      | 4.9%                           | 2.2%                                      |
| <b>7</b>                        | 4.0%                           | 1.6%                                      | 7.0%                           | 3.3%                                      |
| <b>8</b>                        | 5.8%                           | 2.4%                                      | 10.0%                          | 5.0%                                      |
| <b>9</b>                        | 8.5%                           | 3.7%                                      | 14.1%                          | 7.5%                                      |
| <b>10</b>                       | 12.4%                          | 5.8%                                      | 19.7%                          | 11.2%                                     |

**Supplemental Table 5. Life-Threatening Bleeding Event Rates in the RE-LY Trial by Risk Group**

Presented are the observed rates of life-threatening bleeding at 1- year in the RE-LY trial by clinical risk group. Risk category was assigned by the clinical risk prediction score based on 1- year projected rate of major bleeding. Individuals were included if they were included in the dabigatran 150 mg arm of the trial. Individuals with missing information for the candidate variables of interest were excluded. Estimates are based on Cox regression models with risk group as the independent variable.

| <b>Risk Group</b> | <b>Risk Score by DOAC Score</b> | <b>N</b> | <b>Major Bleeding (1-Year)</b> | <b>Life-Threatening Bleeding (1- Year)</b> |
|-------------------|---------------------------------|----------|--------------------------------|--------------------------------------------|
| <b>Very Low</b>   | 0-3                             | 767      | 0.8%                           | 0.3%                                       |
| <b>Low</b>        | 4-5                             | 1249     | 1.6%                           | 0.6%                                       |
| <b>Moderate</b>   | 6-7                             | 1727     | 3.4%                           | 1.4%                                       |
| <b>High</b>       | 8-9                             | 1296     | 6.9%                           | 2.9%                                       |
| <b>Very High</b>  | 10                              | 645      | 13.9%                          | 6.3%                                       |

### Supplemental Table 6. Cohort Variables and Adaptations: GARFIELD-AF

Presented are the variables used in the development cohort (RE-LY trial) and the definitions of the similar variables in the refinement cohort (GARFIELD-AF). CKD = Chronic kidney disease. ASA = Aspirin. DAPT = Dual antiplatelet therapy. NSAID = Nonsteroidal anti-inflammatory drug.

| Risk score variables and categories | POINTS | GARFIELD-AF ADAPTATIONS  |
|-------------------------------------|--------|--------------------------|
| • Age                               |        |                          |
| ○ 65-69                             | 2      |                          |
| ○ 70-74                             | 3      | <i>Same</i>              |
| ○ 75-79                             | 4      |                          |
| ○ 80-84                             | 5      |                          |
| ○ ≥85                               | 5      |                          |
| • Creatinine Clearance/eGFR         |        |                          |
| ○ 30-60                             | 1      | <i>Stage III</i>         |
| ○ <30                               | 2      | <i>Stage IV or V</i>     |
| • Underweight (BMI ≤18.5)           | 1      | <i>Same</i>              |
| • Stroke/TIA/Embolism history       | 1      | <i>Same</i>              |
| • Diabetes                          | 1      | <i>Same</i>              |
| • Hypertension                      | 1      | <i>Same</i> <sup>1</sup> |
| • Antiplatelet use                  |        |                          |
| ○ ASA                               | 2      | <i>Same</i>              |
| ○ DAPT                              | 3      |                          |
| • NSAID use                         | 1      | <i>Same</i> <sup>2</sup> |
| • Bleeding history                  | 3      | <i>Same</i>              |
| • Liver disease                     | 2      | Cirrhosis                |

<sup>1</sup>Defined as CRF-reported hypertension or systolic blood pressure >140 or diastolic blood pressure >90;

<sup>2</sup>NSAID use including individuals on Cox inhibitors



### Supplemental Table 7. Cohort Variables and Adaptations: COMBINE-AF

Presented are the variables used in the development cohort (RE-LY trial) and the definitions of the similar variables in the validation cohort (COMBINE-AF). CKD = Chronic kidney disease. ASA = Aspirin. DAPT = Dual antiplatelet therapy. NSAID = Nonsteroidal anti-inflammatory drug.

| Risk score variables and categories | POINTS | COMBINE-AF ADAPTATIONS   |
|-------------------------------------|--------|--------------------------|
| • Age                               |        |                          |
| ○ 65-69                             | 2      |                          |
| ○ 70-74                             | 3      | <i>Same</i>              |
| ○ 75-79                             | 4      |                          |
| ○ 80-84                             | 5      |                          |
| ○ ≥85                               | 5      |                          |
| • Creatinine Clearance/eGFR         |        |                          |
| ○ 30-60                             | 1      |                          |
| ○ <30                               | 2      |                          |
| • Underweight (BMI ≤18.5)           | 1      | <i>Same</i>              |
| • Stroke/TIA/Embolic history        | 1      | <i>Same</i>              |
| • Diabetes                          | 1      | <i>Same</i>              |
| • Hypertension                      | 1      | <i>Same</i> <sup>1</sup> |
| • Antiplatelet use                  |        |                          |
| ○ ASA                               | 2      | <i>Same</i>              |
| ○ DAPT                              | 3      |                          |
| • NSAID use                         | 1      | <i>Same</i>              |
| • Bleeding history                  | 3      | <i>Same</i>              |
| • Liver disease                     | 2      | <i>Same</i>              |

## Supplemental Table 8. Cohort Variables and Adaptations: RAMQ

Presented are the variables used in the development cohort (RE-LY trial) and the definitions of the similar variables in the validation cohort (RAMQ) (A). Also presented are the ICD-9 and ICD-10 codes used for definitions (B). CKD = Chronic kidney disease. ASA = Aspirin. DAPT = Dual antiplatelet therapy. NSAID = Nonsteroidal anti-inflammatory.

### A) RAMQ Variable Adaptations – Overview

| Risk score variables and categories                                                                                                                                                  | POINTS                                                                                                    | GARFIELD-AF ADAPTATIONS                                                                                                                                                 |
|--------------------------------------------------------------------------------------------------------------------------------------------------------------------------------------|-----------------------------------------------------------------------------------------------------------|-------------------------------------------------------------------------------------------------------------------------------------------------------------------------|
| <ul style="list-style-type: none"> <li>• Age <ul style="list-style-type: none"> <li>○ 65-69</li> <li>○ 70-74</li> <li>○ 75-79</li> <li>○ 80-84</li> <li>○ ≥85</li> </ul> </li> </ul> | <ul style="list-style-type: none"> <li></li> <li>2</li> <li>3</li> <li>4</li> <li>5</li> <li>5</li> </ul> | <ul style="list-style-type: none"> <li></li> <li></li> <li><i>Same</i></li> <li></li> <li></li> <li></li> </ul>                                                         |
| <ul style="list-style-type: none"> <li>• Creatinine Clearance/eGFR <ul style="list-style-type: none"> <li>○ 30-60</li> <li>○ &lt;30</li> </ul> </li> </ul>                           | <ul style="list-style-type: none"> <li></li> <li>1</li> <li>2</li> </ul>                                  | <ul style="list-style-type: none"> <li></li> <li><i>CKD stage<br/>Stage III</i></li> <li><i>Stage IV or V</i></li> </ul>                                                |
| <ul style="list-style-type: none"> <li>• Underweight (BMI ≤18.5)</li> </ul>                                                                                                          | <ul style="list-style-type: none"> <li>1</li> </ul>                                                       | <ul style="list-style-type: none"> <li><i>ICD9/10 Codes</i></li> </ul>                                                                                                  |
| <ul style="list-style-type: none"> <li>• Stroke/TIA/Embolism history</li> </ul>                                                                                                      | <ul style="list-style-type: none"> <li>1</li> </ul>                                                       | <ul style="list-style-type: none"> <li><i>ICD9/10 Codes</i></li> </ul>                                                                                                  |
| <ul style="list-style-type: none"> <li>• Diabetes</li> </ul>                                                                                                                         | <ul style="list-style-type: none"> <li>1</li> </ul>                                                       | <ul style="list-style-type: none"> <li><i>ICD9/10 Codes</i></li> </ul>                                                                                                  |
| <ul style="list-style-type: none"> <li>• Hypertension</li> </ul>                                                                                                                     | <ul style="list-style-type: none"> <li>1</li> </ul>                                                       | <ul style="list-style-type: none"> <li><i>ICD9/10 Codes</i></li> </ul>                                                                                                  |
| <ul style="list-style-type: none"> <li>• Antiplatelet use <ul style="list-style-type: none"> <li>○ ASA</li> </ul> </li> </ul>                                                        | <ul style="list-style-type: none"> <li></li> <li>2</li> </ul>                                             | <ul style="list-style-type: none"> <li></li> <li><i>Dispensation of ASA<br/>within the 2 weeks<br/>preceding the DOAC<br/>initiation</i></li> </ul>                     |
| <ul style="list-style-type: none"> <li>○ DAPT</li> </ul>                                                                                                                             | <ul style="list-style-type: none"> <li>3</li> </ul>                                                       | <ul style="list-style-type: none"> <li><i>Combination of two<br/>antiplatelet<br/>dispensations within the<br/>2 weeks preceding the<br/>DOAC initiation</i></li> </ul> |
| <ul style="list-style-type: none"> <li>• NSAID use</li> </ul>                                                                                                                        | <ul style="list-style-type: none"> <li>1</li> </ul>                                                       | <ul style="list-style-type: none"> <li><i>Dispensation of NSAID<br/>within the 2 weeks</i></li> </ul>                                                                   |

*preceding the DOAC  
initiation*

- Bleeding history 3 ICD9/10 Codes
  - Liver disease 2 ICD9/10 Codes
- 

**B) RAMQ Variable Adaptations: ICD-9 & ICD-10 Codes**

|                                    | <b>ICD-9 codes</b>                                                                                                                                                                                                                                              | <b>ICD-10 codes</b>                                                                                                                                                                                                                                         |
|------------------------------------|-----------------------------------------------------------------------------------------------------------------------------------------------------------------------------------------------------------------------------------------------------------------|-------------------------------------------------------------------------------------------------------------------------------------------------------------------------------------------------------------------------------------------------------------|
| <b>Underweight</b>                 | 783.2, 783.22                                                                                                                                                                                                                                                   | R63.6, V85.0                                                                                                                                                                                                                                                |
| <b>Stroke/TIA/Embolism history</b> | 362.31, 362.32, 433.xx, 434.xx, 435.x, 436,444.x, 557.0, 598.31                                                                                                                                                                                                 | G45, H34.1, H34.2, I63 except 63.6, I67.89, I74, K55.0, N28.0                                                                                                                                                                                               |
| <b>Diabetes</b>                    | 250.xx, 357.2x, 362.0x, 366.41                                                                                                                                                                                                                                  | E10.xx, E11.xx, E12.xx, E13.xx, E14.xx                                                                                                                                                                                                                      |
| <b>Hypertension</b>                | 401.xx                                                                                                                                                                                                                                                          | I10.xx                                                                                                                                                                                                                                                      |
| <b>Bleeding History</b>            | 430, 431, 432.x, 456.1, 530.7, 531.0x, 531.2x, 531.4x, 531.6x, 532.0x, 532.2x, 532.4x, 532.6x, 533.0x, 533.2x, 533.4x, 533.6x, 534.0x, 534.2x, 534.4x, 534.6x, 535.1, 537.83, 562.02, 562.03, 562.12, 562.13, 569.3x, 569.85, 578.0 578.1x, 578.9, 852.x, 853.x | I60, I61, I62, I85.0, K22.6, K25.0, K25.2, K25.4, K25.6, K26.0, K26.2, K26.4, K26.6, K27.0, K27.2, K27.4, K27.6, K28.0, K28.2, K28.4, K28.6, K29.0, K31.811, K57.11, K57.13, K57.31, K57.33, K62.5, K55.21, K92.0, K92.1, K92.2, S06.3, S06.4, S06.5, S06.6 |
| <b>Liver Disease</b>               | 570.xx, 571.xx                                                                                                                                                                                                                                                  | K70.xx – K74.xx                                                                                                                                                                                                                                             |

**Supplemental Table 9. Baseline Characteristics by Major Bleeding Occurrence in GARFIELD-AF**

Presented are baseline characteristics of individuals in the GARFIELD-AF cohort by occurrence of major bleeding. Individuals were included if they were treated with a direct-acting oral anticoagulant and had no missing follow-up information.

| Baseline characteristics                                 | Major bleeding occurrence |                     |
|----------------------------------------------------------|---------------------------|---------------------|
|                                                          | No<br>(N=12,105)          | Yes<br>(N=191)      |
| <b>Sex, n (%)</b>                                        |                           |                     |
| Male                                                     | 6799 (56.2)               | 98 (51.3)           |
| Female                                                   | 5306 (43.8)               | 93 (48.7)           |
| Age, median (Q1; Q3), years                              | 72.0 (64.0;79.0)          | 78.0 (71.0;82.0)    |
| <b>Age, n (%), years</b>                                 |                           |                     |
| <65                                                      | 3118 (25.8)               | 20 (10.5)           |
| 65-69                                                    | 1982 (16.4)               | 23 (12.0)           |
| 70-74                                                    | 2220 (18.3)               | 29 (15.2)           |
| ≥75                                                      | 4785 (39.5)               | 119 (62.3)          |
| <b>Ethnicity, n (%)</b>                                  |                           |                     |
| Caucasian                                                | 7670 (65.0)               | 133 (73.1)          |
| Hispanic/Latino                                          | 519 (4.4)                 | 4 (2.2)             |
| Asian                                                    | 3325 (28.2)               | 40 (22.0)           |
| Afro-Caribbean/Mixed/Other                               | 284 (2.4)                 | 5 (2.7)             |
| Body Mass Index (BMI), median (Q1;Q3), kg/m <sup>2</sup> | 26.8 (23.8;30.7)          | 26.0 (23.0;29.8)    |
| <b>BMI, n (%), kg/m<sup>2</sup></b>                      |                           |                     |
| <18.5                                                    | 172 (1.8)                 | 11 (7.1)            |
| 18.5-24.9                                                | 3225 (33.4)               | 55 (35.7)           |
| 25.0-29.9                                                | 3504 (36.3)               | 50 (32.5)           |
| ≥30.0                                                    | 2762 (28.6)               | 38 (24.7)           |
| Systolic blood pressure, median (Q1; Q3), mmHg           | 132.0 (120.0;145.0)       | 135.0 (121.0;145.0) |
| Diastolic blood pressure, median (Q1; Q3), mmHg          | 80.0 (70.0;88.0)          | 80.0 (70.0;87.0)    |
| Pulse, median (Q1; Q3), bpm                              | 85.0 (70.0;107.0)         | 82.0 (70.0;112.0)   |
| <b>Type of atrial fibrillation, n (%)</b>                |                           |                     |
| Permanent                                                | 1411 (11.7)               | 19 (9.9)            |
| Persistent                                               | 2042 (16.9)               | 26 (13.6)           |
| Paroxysmal                                               | 3962 (32.7)               | 54 (28.3)           |
| New onset (unclassified)                                 | 4690 (38.7)               | 92 (48.2)           |
| <b>Care setting specialty at diagnosis, n (%)</b>        |                           |                     |
| Internal medicine/Neurology/Geriatrics                   | 2128 (17.6)               | 43 (22.5)           |

|                                                               |               |               |
|---------------------------------------------------------------|---------------|---------------|
| Cardiology                                                    | 8673 (71.6)   | 127 (66.5)    |
| Primary care/General practice                                 | 1304 (10.8)   | 21 (11.0)     |
| <b>Care setting location at diagnosis, n (%)</b>              |               |               |
| Hospital                                                      | 5919 (48.9)   | 108 (56.5)    |
| Office/Anticoagulation clinic/thrombosis centre               | 5070 (41.9)   | 64 (33.5)     |
| Emergency room                                                | 1116 (9.2)    | 19 (9.9)      |
| <b>Medical history, n (%)</b>                                 |               |               |
| Heart failure                                                 | 2538 (21.0)   | 42 (22.0)     |
| Acute coronary syndromes                                      | 1138 (9.4)    | 21 (11.0)     |
| Vascular disease <sup>1</sup>                                 | 2563 (21.4)   | 46 (24.1)     |
| Carotid occlusive disease                                     | 376 (3.2)     | 12 (6.4)      |
| VTE                                                           | 284 (2.4)     | 9 (4.7)       |
| Prior stroke/TIA/SE                                           | 1299 (10.8)   | 31 (16.4)     |
| Prior bleeding                                                | 226 (1.9)     | 6 (3.2)       |
| Hypertension                                                  | 9212 (76.3)   | 154 (81.1)    |
| Hypercholesterolaemia                                         | 5147 (44.0)   | 81 (43.3)     |
| Diabetes                                                      | 2587 (21.4)   | 52 (27.2)     |
| Cirrhosis                                                     | 37 (0.3)      | 4 (2.1)       |
| Dementia                                                      | 200 (1.7)     | 5 (2.7)       |
| <b>CKD stage, n (%)</b>                                       |               |               |
| None, Stage I or II (GFR $\geq$ 60)                           | 10540 (90.2)  | 148 (79.6)    |
| Stage III (GFR 30-59)                                         | 1079 (9.2)    | 33 (17.7)     |
| Stage IV or V (GFR <30)                                       | 67 (0.6)      | 5 (2.7)       |
| Heavy alcohol consumption, n (%)                              | 200 (2.0)     | 5 (3.3)       |
| Current smoker, n (%)                                         | 3914 (35.6)   | 57 (32.4)     |
| ASA therapy                                                   | 1273 (10.5)   | 26 (13.6)     |
| DAP therapy                                                   | 310 (2.6)     | 9 (4.7)       |
| NSAID therapy                                                 | 449 (3.7)     | 18 (9.4)      |
| CHA <sub>2</sub> DS <sub>2</sub> -VASc score, median (Q1; Q3) | 3.0 (2.0;4.0) | 4.0 (3.0;5.0) |
| HAS-BLED score, median (Q1; Q3) <sup>2</sup>                  | 1.0 (1.0;2.0) | 2.0 (1.0;2.0) |
| GARFIELD death score, median (Q1; Q3) <sup>3</sup>            | 3.8 (2.2;6.9) | 6.5 (3.8;9.9) |
| GARFIELD stroke score, median (Q1; Q3) <sup>4</sup>           | 1.2 (0.9;1.8) | 1.7 (1.2;2.3) |
| GARFIELD bleeding score, median (Q1; Q3) <sup>5</sup>         | 1.4 (1.0;2.1) | 1.9 (1.5;2.8) |

<sup>1</sup>Defined as peripheral artery disease and/or coronary artery disease;

<sup>2</sup>The risk factor 'Labile INRs' is not included in the HAS-BLED score as it is not collected at baseline. As a result, the maximum HAS-BLED score at baseline is 8 points (not 9);

<sup>3</sup>Represent the risk of mortality within 2 years;

<sup>4</sup>Represent the risk of non-haemorrhagic stroke within 2 years;

<sup>5</sup>Represent the risk of major bleeding within 2 years.

**Supplemental Table 10. Baseline Characteristics by Major Bleeding Occurrence in COMBINE-AF**

Presented are baseline characteristics of individuals in the COMBINE-AF cohort by occurrence of major bleeding. Individuals were included if they were treated with a direct-acting oral anticoagulant.

| <b>Major Bleeding Outcome</b>                        | <b>No<br/>(N=24,894)</b> | <b>Yes<br/>(N=692)</b> |
|------------------------------------------------------|--------------------------|------------------------|
| <b>Age</b>                                           |                          |                        |
| <65                                                  | 6825 (27.4)              | 113 (16.3)             |
| 65-69                                                | 4014 (16.1)              | 102 (14.7)             |
| 70-74                                                | 4903 (19.7)              | 107 (15.5)             |
| 75-79                                                | 5232 (21)                | 189 (27.3)             |
| >=80                                                 | 3920 (15.7)              | 181 (26.2)             |
| <b>Creatinine Clearance</b>                          |                          |                        |
| >60                                                  | 16,514 (66.3)            | 374 (54)               |
| 30-60                                                | 8131 (32.7)              | 310 (44.8)             |
| <30                                                  | 249 (1)                  | 8 (1.2)                |
| <b>Body Mass Index &lt; 18.5</b>                     | 264 (1.1)                | 11 (1.6)               |
| <b>Stroke/TIA/Embolism history</b>                   | 7507 (30.2)              | 254 (36.7)             |
| <b>Diabetes</b>                                      | 7828 (31.4)              | 272 (39.3)             |
| <b>Hypertension</b>                                  | 22,328 (89.7)            | 621 (89.7)             |
| <b>Antiplatelet use</b>                              |                          |                        |
| Aspirin                                              | 7845 (31.5)              | 297 (42.9)             |
| Dual Antiplatelet                                    | 445 (1.8)                | 24 (3.5)               |
| NSAID use                                            | 1055 (4.2)               | 46 (6.6)               |
| <b>Bleeding history</b>                              | 2310 (9.3)               | 106 (15.3)             |
| <b>Liver disease</b>                                 | 109 (0.4)                | 3 (0.4)                |
| <b>Age - Mean(SD)</b>                                | 70 (9.5)                 | 73.5 (8.6)             |
| <b>Female</b>                                        | 9436 (37.9)              | 222 (32.1)             |
| <b>Race</b>                                          |                          |                        |
| White                                                | 20,394 (81.9)            | 570 (82.4)             |
| Black                                                | 305 (1.2)                | 12 (1.7)               |
| Asian                                                | 3536 (14.2)              | 95 (13.7)              |
| Other                                                | 659 (2.6)                | 15 (2.2)               |
| <b>CHA<sub>2</sub>DS<sub>2</sub>-VASc- Mean (SD)</b> | 4 (1.6)                  | 4.6 (1.4)              |
| <b>HAS-BLED - Mean (SD)</b>                          | 2.4 (1.1)                | 2.8 (1.1)              |
| <b>Smoking history (current or former)</b>           | 10,270 (41.3)            | 345 (49.9)             |

### Supplemental Table 11. Baseline Characteristics by Major Bleeding Occurrence in RAMQ

Presented are baseline characteristics of individuals in the RAMQ cohort by occurrence of major bleeding. Individuals were included if they were treated with rivaroxaban (20mg daily) or apixaban (5mg twice per day). The cohort included adults hospitalized between 2011 and 2017.

| Baseline Characteristics                                      | Major bleeding occurrence |                  |
|---------------------------------------------------------------|---------------------------|------------------|
|                                                               | Yes<br>(n=258)            | No<br>(n=11,687) |
| <b>Age</b> – mean (SD)                                        | 78.4 (7.6)                | 75.1 (8.9)       |
| <b>Male</b> - %                                               | 52.7%                     | 52.9%            |
| <b>CHA<sub>2</sub>DS<sub>2</sub>-VASc Score</b> – mean (SD)   | 3.7 (1.3)                 | 3.2 (1.4)        |
| <b>HAS-BLED Score</b> – mean (SD)                             | 3.1 (1.2)                 | 2.8 (1.3)        |
| <b>Charlson Score Index</b> – mean (SD)                       | 4.8 (3.5)                 | 4.0 (3.4)        |
| <b>Comorbidities</b> - %                                      |                           |                  |
| Hypertension                                                  | 83.7 %                    | 77.2 %           |
| Dyslipidemia                                                  | 57.0%                     | 52.4%            |
| Diabetes                                                      | 41.9%                     | 33.9%            |
| Coronary artery disease                                       | 55.4%                     | 44.5%            |
| Acute myocardial infarction                                   | 13.2%                     | 10.0%            |
| Chronic heart failure                                         | 38.9%                     | 29.4%            |
| Cardiomyopathy                                                | 10.5%                     | 6.5%             |
| Other dysrhythmias                                            | 17.8%                     | 18.5%            |
| Valvular disease                                              | 20.2%                     | 14.2%            |
| Prior cerebrovascular disease including TIA                   | 17.4%                     | 16.5%            |
| Peripheral vascular disease                                   | 26.4%                     | 17.4%            |
| Chronic renal failure                                         | 28.3%                     | 23.0%            |
| Chronic renal failure < 30 mL/min                             | 4.3%                      | 1.6%             |
| Acute renal failure                                           | 20.2%                     | 15.2%            |
| Chronic obstructive pulmonary disease/asthma                  | 43.8%                     | 35.8%            |
| Liver disease                                                 | 3.1%                      | 2.3%             |
| Depression                                                    | 12.4%                     | 10.7%            |
| <b>Medical procedures (3 years prior to cohort entry)</b> - % |                           |                  |
| Cardiac catheterization                                       | 5.0%                      | 3.4%             |
| Percutaneous coronary intervention – Stent                    | 3.1%                      | 2.0%             |
| Coronary artery bypass grafting                               | 0.4%                      | 0.7%             |
| <b>Medications in the 2-week prior to cohort entry</b> - %    |                           |                  |
| Diuretics                                                     | 39.5%                     | 30.8%            |
| Loop diuretics                                                | 30.6%                     | 23.8%            |
| B-Blockers                                                    | 57.0%                     | 63.9%            |
| Inhibitors of renin-angiotensin system                        | 33.3%                     | 35.6%            |
| Calcium channel blockers                                      | 34.9%                     | 34.2%            |
| Statin                                                        | 50.0%                     | 43.2%            |
| Antidiabetics                                                 | 23.3%                     | 20.0%            |
| Low dose ASA                                                  | 26.7%                     | 20.7%            |

|                                                                |           |            |
|----------------------------------------------------------------|-----------|------------|
| Proton pump inhibitors                                         | 43.8%     | 40.2%      |
| NSAIDs                                                         | 1.9%      | 1.3%       |
| Digoxin                                                        | 9.3%      | 8.9%       |
| <b>Health medical service in 3-y prior to cohort entry</b>     |           |            |
| Mean number of specialty visits - mean (SD)                    | 4.2 (6.0) | 3.7 (6.0)  |
| Mean number of family physician visits - mean (SD)             | 3.1 (7.5) | 2.6 (5.8)  |
| Mean number of emergency visits - mean (SD)                    | 5.2 (4.7) | 4.3 (4.4)  |
| <b>Health hospital service in 3-year prior to cohort entry</b> |           |            |
| Mean number of all-cause hospital admission - mean (SD)        | 2.4 (1.9) | 2.1 (1.9)  |
| Length of stay - mean (SD)                                     | 8.3 (8.4) | 7.8 (10.3) |



**Supplemental Table 12. One-Year Bleeding Rates by Risk Category for Individuals in COBMINE-AF**

Presented are the 1-year estimates of intracranial bleeding in COMBINE-AF by the DOAC Score assigned risk category. Risk categories were assigned by the DOAC Score based on risk score. Each individual could be assigned a risk score from 0-10, with the following risk categories: very low (score 1-3), low (score 4-5), moderate (score 6-7), high (score 8-9) and very high (score 10).

| <b>Risk Group</b> | <b>Risk Score by DOAC Score</b> | <b>N</b> | <b>Intracranial Bleeding Events</b> | <b>Intracranial Bleeding Rate (1-Year)</b> |
|-------------------|---------------------------------|----------|-------------------------------------|--------------------------------------------|
| <b>Very Low</b>   | 0-3                             | 6038     | 19                                  | 0.3                                        |
| <b>Low</b>        | 4-5                             | 6630     | 20                                  | 0.3                                        |
| <b>Moderate</b>   | 6-7                             | 7348     | 27                                  | 0.4                                        |
| <b>High</b>       | 8-9                             | 4015     | 26                                  | 0.8                                        |
| <b>Very High</b>  | 10                              | 1555     | 7                                   | 0.6                                        |

**Supplemental Table 13. The DOAC Score Performance by Trial in COBMINe-AF**

Presented is the performance of the DOAC Score by trial included in COMBINE-AF for major bleeding (A) and fatal bleeding (B). C-statistics are presented with 95% confidence intervals. The P-value comparing the performance of the DOAC Score and HAS-BLED score in the overall cohort used deLong P-values based on a year risk. The overall comparison involved models adjusted for trial. Number of events are events in one-year.

**A) Major Bleeding**

| <b>Trial</b>     | <b>N</b> | <b>Number of Events</b> | <b>DOAC Score, C-Statistic</b> | <b>HAS-BLED score, C-Statistic</b> | <b>P-value</b> |
|------------------|----------|-------------------------|--------------------------------|------------------------------------|----------------|
| <b>ARISTOTLE</b> | 8999     | 188                     | 0.66 (0.61 - 0.70)             | 0.61 (0.57 - 0.65)                 |                |
| <b>ROCKET</b>    | 7055     | 253                     | 0.63 (0.60 - 0.67)             | 0.55 (0.52 - 0.58)                 |                |
| <b>ENGAGE</b>    | 6819     | 213                     | 0.64 (0.60 - 0.68)             | 0.63 (0.59 - 0.66)                 |                |
| <b>AVERROES</b>  | 2713     | 38                      | 0.71 (0.62 - 0.80)             | 0.64 (0.55 - 0.73)                 |                |
| <b>OVERALL</b>   | 25586    | 692                     | 0.67 (0.64 - 0.69)             | 0.63 (0.61 - 0.65)                 | <0.001         |

**B) Fatal Bleeding**

| <b>Trial</b>     | <b>N</b> | <b>Number of Events</b> | <b>DOAC Score, C-Statistic</b> | <b>HAS-BLED score, C-Statistic</b> | <b>P-value</b> |
|------------------|----------|-------------------------|--------------------------------|------------------------------------|----------------|
| <b>ARISTOTLE</b> | 8999     | 5                       | 0.72 (0.47 - 0.97)             | 0.54 (0.30 - 0.78)                 |                |
| <b>ROCKET</b>    | 7055     | 23                      | 0.63 (0.51 - 0.75)             | 0.55 (0.44 - 0.66)                 |                |
| <b>ENGAGE</b>    | 6819     | 14                      | 0.59 (0.44 - 0.74)             | 0.55 (0.41 - 0.69)                 |                |
| <b>AVERROES</b>  | 2713     | 3                       | 0.77 (0.44 - 1.10)             | 0.48 (0.17 - 0.80)                 |                |
| <b>OVERALL</b>   | 25586    | 45                      | 0.72 (0.63 - 0.80)             | 0.68 (0.60 - 0.77)                 | 0.14           |

**Supplemental Table 14. TRIPOD Checklist: Prediction Model Development and Validation**

| Section/Topic             | Item | Checklist Item | Page                                                                                                                                                                                             |                         |
|---------------------------|------|----------------|--------------------------------------------------------------------------------------------------------------------------------------------------------------------------------------------------|-------------------------|
| <b>Title and abstract</b> |      |                |                                                                                                                                                                                                  |                         |
| Title                     | 1    | D;<br>✓        | Identify the study as developing and/or validating a multivariable prediction model, the target population, and the outcome to be predicted.                                                     | 1                       |
| Abstract                  | 2    | D;<br>✓        | Provide a summary of objectives, study design, setting, participants, sample size, predictors, outcome, statistical analysis, results, and conclusions.                                          | 2                       |
| <b>Introduction</b>       |      |                |                                                                                                                                                                                                  |                         |
| Background and objectives | 3a   | D;<br>✓        | Explain the medical context (including whether diagnostic or prognostic) and rationale for developing or validating the multivariable prediction model, including references to existing models. | 4-5                     |
|                           | 3b   | D;<br>✓        | Specify the objectives, including whether the study describes the development or validation of the model or both.                                                                                | 4-5                     |
| <b>Methods</b>            |      |                |                                                                                                                                                                                                  |                         |
| Source of data            | 4a   | D;<br>✓        | Describe the study design or source of data (e.g., randomized trial, cohort, or registry data), separately for the development and validation data sets, if applicable.                          | 5-6, 9-11               |
|                           | 4b   | D;<br>✓        | Specify the key study dates, including start of accrual; end of accrual; and, if applicable, end of follow-up.                                                                                   | 5-6, 9-12               |
| Participants              | 5a   | D;<br>✓        | Specify key elements of the study setting (e.g., primary care, secondary care, general population) including number and location of centres.                                                     | 5-6, 9-12               |
|                           | 5b   | D;<br>✓        | Describe eligibility criteria for participants.                                                                                                                                                  | 5-12                    |
|                           | 5c   | D;<br>✓        | Give details of treatments received, if relevant.                                                                                                                                                | 5-12                    |
| Outcome                   | 6a   | D;<br>✓        | Clearly define the outcome that is predicted by the prediction model, including how and when assessed.                                                                                           | 7, 10-12, Supplemental  |
|                           | 6b   | D;<br>✓        | Report any actions to blind assessment of the outcome to be predicted.                                                                                                                           | NA (Secondary analysis) |
| Predictors                | 7a   | D;<br>✓        | Clearly define all predictors used in developing or validating the multivariable prediction model, including how and when they were measured.                                                    | Supplemental            |
|                           | 7b   | D;<br>✓        | Report any actions to blind assessment of predictors for the outcome and other predictors.                                                                                                       | NA (Secondary analysis) |
| Sample size               | 8    | D;<br>✓        | Explain how the study size was arrived at.                                                                                                                                                       | 5-6, 9-12               |

|                              |     |         |                                                                                                                                                                                                       |                                  |
|------------------------------|-----|---------|-------------------------------------------------------------------------------------------------------------------------------------------------------------------------------------------------------|----------------------------------|
| Missing data                 | 9   | D;<br>V | Describe how missing data were handled (e.g., complete-case analysis, single imputation, multiple imputation) with details of any imputation method.                                                  | 6, 8-9                           |
| Statistical analysis methods | 10a | D       | Describe how predictors were handled in the analyses.                                                                                                                                                 | 8                                |
|                              | 10b | D       | Specify type of model, all model-building procedures (including any predictor selection), and method for internal validation.                                                                         | 8-9                              |
|                              | 10c | V       | For validation, describe how the predictions were calculated.                                                                                                                                         | 9-11                             |
|                              | 10d | D;<br>V | Specify all measures used to assess model performance and, if relevant, to compare multiple models.                                                                                                   | 5-12                             |
|                              | 10e | V       | Describe any model updating (e.g., recalibration) arising from the validation, if done.                                                                                                               | 8-9,<br>Supplemental             |
| Risk groups                  | 11  | D;<br>V | Provide details on how risk groups were created, if done.                                                                                                                                             | 8                                |
| Development vs. validation   | 12  | V       | For validation, identify any differences from the development data in setting, eligibility criteria, outcome, and predictors.                                                                         | 9-12,<br>Supplemental            |
| <b>Results</b>               |     |         |                                                                                                                                                                                                       |                                  |
| Participants                 | 13a | D;<br>V | Describe the flow of participants through the study, including the number of participants with and without the outcome and, if applicable, a summary of the follow-up time. A diagram may be helpful. | 12-13,16-17                      |
|                              | 13b | D;<br>V | Describe the characteristics of the participants (basic demographics, clinical features, available predictors), including the number of participants with missing data for predictors and outcome.    | 6, 8-9, Table 1,<br>Supplemental |
|                              | 13c | V       | For validation, show a comparison with the development data of the distribution of important variables (demographics, predictors and outcome).                                                        | Supplemental                     |
| Model development            | 14a | D       | Specify the number of participants and outcome events in each analysis.                                                                                                                               | Table 3                          |
|                              | 14b | D       | If done, report the unadjusted association between each candidate predictor and outcome.                                                                                                              | NA                               |
| Model specification          | 15a | D       | Present the full prediction model to allow predictions for individuals (i.e., all regression coefficients, and model intercept or baseline survival at a given time point).                           | Supplemental                     |
|                              | 15b | D       | Explain how to use the prediction model.                                                                                                                                                              | Table 2                          |
| Model performance            | 16  | D;<br>V | Report performance measures (with CIs) for the prediction model.                                                                                                                                      | Table 3                          |
| Model-updating               | 17  | V       | If done, report the results from any model updating (i.e., model specification, model performance).                                                                                                   | Supplemental                     |
| <b>Discussion</b>            |     |         |                                                                                                                                                                                                       |                                  |
| Limitations                  | 18  | D;<br>V | Discuss any limitations of the study (such as nonrepresentative sample, few events per predictor, missing data).                                                                                      | 19                               |

|                           |     |         |                                                                                                                                                |       |
|---------------------------|-----|---------|------------------------------------------------------------------------------------------------------------------------------------------------|-------|
| Interpretation            | 19a | V       | For validation, discuss the results with reference to performance in the development data, and any other validation data.                      | 17    |
|                           | 19b | D;<br>V | Give an overall interpretation of the results, considering objectives, limitations, results from similar studies, and other relevant evidence. | 17-19 |
| Implications              | 20  | D;<br>V | Discuss the potential clinical use of the model and implications for future research.                                                          | 17-19 |
| <b>Other information</b>  |     |         |                                                                                                                                                |       |
| Supplementary information | 21  | D;<br>V | Provide information about the availability of supplementary resources, such as study protocol, Web calculator, and data sets.                  | 12    |
| Funding                   | 22  | D;<br>V | Give the source of funding and the role of the funders for the present study.                                                                  | 20    |

\*Items relevant only to the development of a prediction model are denoted by D, items relating solely to a validation of a prediction model are denoted by V, and items relating to both are denoted D;V. We recommend using the TRIPOD Checklist in conjunction with the TRIPOD Explanation and Elaboration document.

## Supplemental Methods

### Definitions of Major Bleeding

RE-LY: Defined per the International Society on Thrombosis and Haemostasis (ISTH) criteria: a 20 gram per liter reduction in hemoglobin, 2-unit transfusion need, fatal bleeding, or symptomatic bleeding in a critical area or organ.

GARFIELD-AF: Defined per the ISTH criteria: a 20 gram per liter reduction in hemoglobin, 2-unit transfusion need, fatal bleeding, or symptomatic bleeding in a critical area or organ.

COMBINE-AF: Defined per the ISTH criteria: a 20 gram per liter reduction in hemoglobin, 2-unit transfusion need, fatal bleeding, or symptomatic bleeding in a critical area or organ. Any bleeding events occurring intracranial were reported in Supplemental Table 12.

RAMQ Database: Defined by ICD-9 and ICD-10 billing codes as listed below, including billing codes for major intracranial bleeding and major gastroenterological (GI) bleeding. The major intracranial bleeding category was used to provide estimates for intracranial bleeding events (see results).

ICD-9 and ICD-10 Billing Codes Used in RAMQ to define major bleeding:

|                                                          | ICD-9 codes                                                                                                                                                                                                                            | ICD-10 codes                                                                                                                                                                                                                                            |
|----------------------------------------------------------|----------------------------------------------------------------------------------------------------------------------------------------------------------------------------------------------------------------------------------------|---------------------------------------------------------------------------------------------------------------------------------------------------------------------------------------------------------------------------------------------------------|
| <b>Major bleeding</b>                                    |                                                                                                                                                                                                                                        |                                                                                                                                                                                                                                                         |
| Major intracranial bleeding                              | 430, 431, 432.x, 852.x, 853.x (primary diagnosis or the first secondary diagnosis using Med-Echo)                                                                                                                                      | I60, I61, I62, S06.3, S06.4, S06.5, S06.6 (primary diagnosis or the first secondary diagnosis using Med-Echo)                                                                                                                                           |
| Major GI bleeding                                        |                                                                                                                                                                                                                                        |                                                                                                                                                                                                                                                         |
| Upper gastrointestinal bleeding<br>(only using Med-Echo) | 456.1, 530.7, 531.0x, 531.2x, 531.4x, 531.6x, 532.0x, 532.2x, 532.4x, 532.6x, 533.0x, 533.2x, 533.4x, 533.6x, 534.0x, 534.2x, 534.4x, 534.6x, 535.1, 537.83, 578.0 (primary diagnosis only using Med-Echo)                             | I85.0, K22.6, K25.0, K25.2, K25.4, K25.6, K26.0, K26.2, K26.4, K26.6, K27.0, K27.2, K27.4, K27.6, K28.0, K28.2, K28.4, K28.6, K29.0, K31.811, K92.0 (primary diagnosis only using Med-Echo)                                                             |
| Upper gastrointestinal bleeding<br>(only using RAMQ)     | 456.1, 530.7, 531.0x, 531.2x, 531.4x, 531.6x, 532.0x, 532.2x, 532.4x, 532.6x, 533.0x, 533.2x, 533.4x, 533.6x, 534.0x, 534.2x, 534.4x, 534.6x, 535.1, 537.83, 578.0 RAMQ ICD-9 at an emergency room and procedure endoscopic control of | I85.0, K22.6, K25.0, K25.2, K25.4, K25.6, K26.0, K26.2, K26.4, K26.6, K27.0, K27.2, K27.4, K27.6, K28.0, K28.2, K28.4, K28.6, K29.0, K31.811, K92.0 RAMQ ICD-9 at an emergency room and procedure endoscopic control of gastric or duodenal bleeding or |

|                                 |                                                                                                                                                                                                                      |                                                                                                                                                                                 |
|---------------------------------|----------------------------------------------------------------------------------------------------------------------------------------------------------------------------------------------------------------------|---------------------------------------------------------------------------------------------------------------------------------------------------------------------------------|
|                                 | gastric or duodenal bleeding or upper gastrointestinal endoscopy including esophagus, stomach, and either the duodenum and/or jejunum as appropriate with control of bleeding, any method (code 00691) within 7 days | upper gastrointestinal endoscopy including esophagus, stomach, and either the duodenum and/or jejunum as appropriate with control of bleeding, any method (00691) within 7 days |
| Lower gastrointestinal bleeding | 562.02, 562.03, 562.12, 562.13, 569.3x, 569.85, 578.1x, 578.9 (primary diagnosis only using Med-Echo)                                                                                                                | K57.11, K57.13, K57.31, K57.33, K62.5, K55.21, K92.1, K92.2 (primary diagnosis only using Med-Echo)                                                                             |
